# Supplementary material for: Combined Effect of Modified Atmosphere Packaging and UV-C Radiation on Pathogens Reduction, Biogenic Amines, and Shelf Life of Refrigerated Tilapia (Oreochromis niloticus) Fillets
Source: PubMed Central journal article supplement (PMC7397001; doi:10.3390/molecules25143222), 2020-07-15
Supplement: molecules-25-03222-s001.pdf [file molecules-25-03222-s001.pdf]

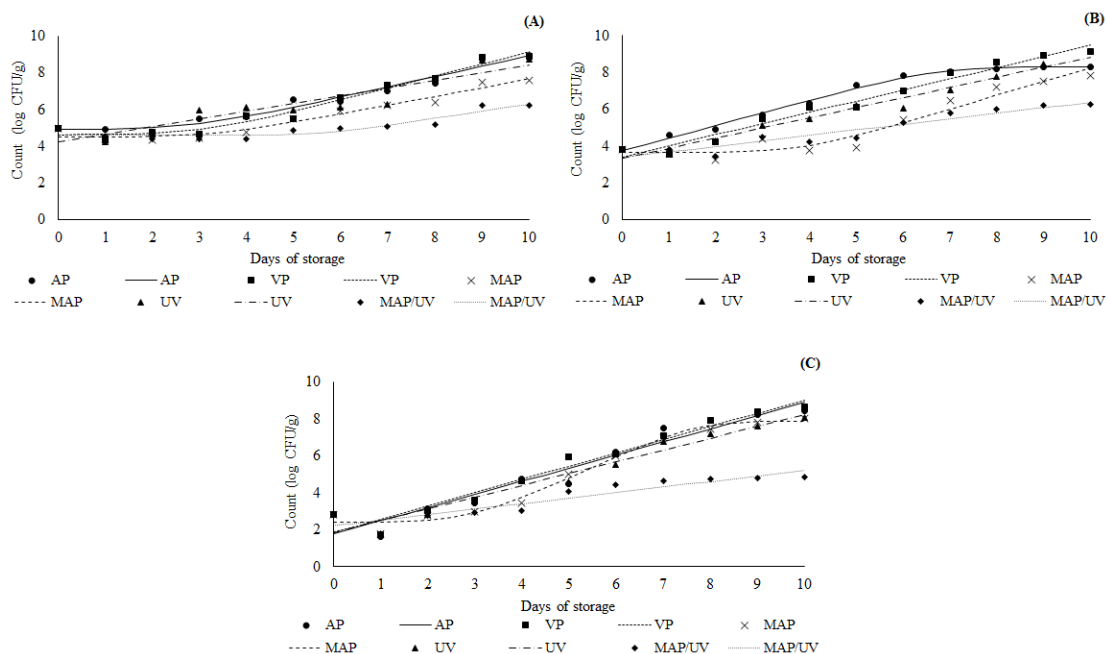

**Supplementary File S1.** Total aerobic mesophilic count (A), total aerobic psychrotrophic count (B), and *Enterobacteriaceae* count (C) in tilapia (*Oreochromis niloticus*) fillets non- and treated with ultraviolet radiation (UV-C) and modified atmosphere packaging (MAP) stored at  $4 \pm 1$  °C for 10 days. Results are expressed as the mean of log CFU (colony forming units)/g  $\pm$  standard deviation ( $n = 10$ ). Symbols indicate the real average values and lines represent the fitted values by primary predictive model designed by Baranyi and Roberts [34]. AP – air-packed tilapia fillets, VP – vacuum-packed tilapia fillets, MAP – MAP-packed tilapia fillets with 50% CO<sub>2</sub> and 50% N<sub>2</sub>, UV – UV-C treated tilapia fillets at 0.30 J/cm<sup>2</sup>, and MAP/UV – MAP-packed tilapia fillets with 50% CO<sub>2</sub> and 50% N<sub>2</sub> treated with UV-C at 0.30 J/cm<sup>2</sup>

**Supplementary File S2.** Biogenic amines, expressed in mg/kg, in tilapia (*Oreochromis niloticus*) fillets non- and treated with ultraviolet radiation (UV-C) and modified atmosphere packaging (MAP) stored at  $4 \pm 1$  °C for 10 days.

| Parameters             | Treatments <sup>y</sup> | Days of storage           |                          |                          |                          |                          |                           |                          |                          |                          |                          |
|------------------------|-------------------------|---------------------------|--------------------------|--------------------------|--------------------------|--------------------------|---------------------------|--------------------------|--------------------------|--------------------------|--------------------------|
|                        |                         | 1                         | 2                        | 3                        | 4                        | 5                        | 6                         | 7                        | 8                        | 9                        | 10                       |
| Histamine              | AP                      | 0.05±0.01 <sup>c</sup>    | 0.04±0.00 <sup>c</sup>   | 0.07±0.00 <sup>c</sup>   | 0.16±0.01 <sup>b</sup>   | 0.17±0.02 <sup>b</sup>   | 0.22±0.03 <sup>a</sup>    | 0.17±0.01 <sup>b</sup>   | 0.17±0.02 <sup>b</sup>   | 0.05±0.00 <sup>c</sup>   | 0.04±0.00 <sup>c</sup>   |
|                        | VP                      | 0.06±0.01 <sup>e</sup>    | 0.17±0.01 <sup>b</sup>   | 0.14±0.00 <sup>c</sup>   | 0.24±0.01 <sup>a</sup>   | 0.11±0.01 <sup>d</sup>   | 0.14±0.01 <sup>c</sup>    | 0.06±0.00 <sup>e</sup>   | 0.06±0.00 <sup>e</sup>   | 0.06±0.01 <sup>e</sup>   | 0.06±0.00 <sup>e</sup>   |
|                        | MAP                     | 0.00±0.00 <sup>e</sup>    | 0.05±0.00 <sup>cd</sup>  | 0.07±0.01 <sup>bc</sup>  | 0.07±0.00 <sup>b</sup>   | 0.05±0.00 <sup>d</sup>   | 0.08±0.01 <sup>b</sup>    | 0.16±0.01 <sup>a</sup>   | 0.17±0.01 <sup>a</sup>   | 0.05±0.01 <sup>d</sup>   | 0.05±0.00 <sup>d</sup>   |
|                        | UV                      | 0.05±0.00 <sup>g</sup>    | 0.13±0.00 <sup>bc</sup>  | 0.12±0.00 <sup>cd</sup>  | 0.12±0.00 <sup>cd</sup>  | 0.14±0.01 <sup>ab</sup>  | 0.15±0.01 <sup>a</sup>    | 0.12±0.00 <sup>d</sup>   | 0.09±0.00 <sup>e</sup>   | 0.04±0.00 <sup>g</sup>   | 0.06±0.01 <sup>f</sup>   |
|                        | MAP/UV                  | 0.11±0.01 <sup>e</sup>    | 0.34±0.00 <sup>c</sup>   | 0.47±0.03 <sup>b</sup>   | 0.79±0.00 <sup>a</sup>   | 0.22±0.00 <sup>d</sup>   | 0.08±0.00 <sup>ef</sup>   | 0.07±0.00 <sup>f</sup>   | 0.08±0.01 <sup>f</sup>   | 0.09±0.01 <sup>ef</sup>  | 0.08±0.00 <sup>ef</sup>  |
| Tyramine               | AP                      | 0.07±0.00 <sup>e</sup>    | 0.04±0.00 <sup>f</sup>   | 0.04±0.00 <sup>f</sup>   | 0.08±0.00 <sup>e</sup>   | 0.22±0.00 <sup>d</sup>   | 0.34±0.00 <sup>c</sup>    | 0.46±0.00 <sup>a</sup>   | 0.44±0.00 <sup>b</sup>   | 0.33±0.01 <sup>c</sup>   | 0.04±0.00 <sup>f</sup>   |
|                        | VP                      | 0.04±0.00 <sup>c</sup>    | 0.04±0.00 <sup>c</sup>   | 0.16±0.00 <sup>b</sup>   | 0.32±0.00 <sup>a</sup>   | 0.04±0.00 <sup>c</sup>   | 0.04±0.00 <sup>c</sup>    | 0.04±0.00 <sup>c</sup>   | 0.03±0.00 <sup>d</sup>   | 0.04±0.00 <sup>c</sup>   | 0.04±0.00 <sup>c</sup>   |
|                        | MAP                     | 0.04±0.00 <sup>d</sup>    | 0.04±0.00 <sup>d</sup>   | 0.04±0.00 <sup>d</sup>   | 0.32±0.01 <sup>a</sup>   | 0.29±0.00 <sup>b</sup>   | 0.32±0.00 <sup>a</sup>    | 0.22±0.00 <sup>c</sup>   | 0.02±0.00 <sup>e</sup>   | 0.04±0.00 <sup>d</sup>   | 0.04±0.00 <sup>d</sup>   |
|                        | UV                      | 0.04±0.00 <sup>a</sup>    | 0.04±0.00 <sup>a</sup>   | 0.04±0.00 <sup>a</sup>   | 0.04±0.00 <sup>a</sup>   | 0.04±0.00 <sup>a</sup>   | 0.04±0.00 <sup>a</sup>    | 0.04±0.00 <sup>a</sup>   | 0.04±0.00 <sup>a</sup>   | 0.04±0.00 <sup>a</sup>   | 0.04±0.00 <sup>a</sup>   |
|                        | MAP/UV                  | 0.04±0.00 <sup>b</sup>    | 0.04±0.00 <sup>ab</sup>  | 0.04±0.00 <sup>b</sup>   | 0.05±0.00 <sup>a</sup>   | 0.03±0.00 <sup>c</sup>   | 0.04±0.00 <sup>b</sup>    | 0.04±0.00 <sup>b</sup>   | 0.04±0.00 <sup>b</sup>   | 0.04±0.00 <sup>b</sup>   | 0.04±0.00 <sup>b</sup>   |
| Cadaverin <sup>e</sup> | AP                      | 0.01±0.00 <sup>e</sup>    | 0.01±0.00 <sup>e</sup>   | 0.04±0.00 <sup>c</sup>   | 0.03±0.00 <sup>de</sup>  | 0.04±0.00 <sup>cd</sup>  | 0.04±0.00 <sup>cd</sup>   | 0.04±0.00 <sup>cd</sup>  | 0.06±0.00 <sup>b</sup>   | 0.07±0.01 <sup>b</sup>   | 0.19±0.01 <sup>a</sup>   |
|                        | VP                      | 0.00±0.00 <sup>e</sup>    | 0.02±0.00 <sup>d</sup>   | 0.03±0.00 <sup>c</sup>   | 0.02±0.00 <sup>d</sup>   | 0.02±0.00 <sup>d</sup>   | 0.01±0.00 <sup>de</sup>   | 0.07±0.01 <sup>b</sup>   | 0.07±0.00 <sup>b</sup>   | 0.11±0.00 <sup>a</sup>   | 0.12±0.00 <sup>a</sup>   |
|                        | MAP                     | 0.00±0.00 <sup>f</sup>    | 0.00±0.00 <sup>f</sup>   | 0.01±0.00 <sup>e</sup>   | 0.02±0.00 <sup>d</sup>   | 0.04±0.00 <sup>c</sup>   | 0.02±0.00 <sup>d</sup>    | 0.03±0.00 <sup>c</sup>   | 0.08±0.00 <sup>a</sup>   | 0.07±0.00 <sup>b</sup>   | 0.07±0.00 <sup>b</sup>   |
|                        | UV                      | 0.00±0.00 <sup>g</sup>    | 0.00±0.00 <sup>g</sup>   | 0.01±0.00 <sup>f</sup>   | 0.01±0.00 <sup>fg</sup>  | 0.01±0.00 <sup>e</sup>   | 0.02±0.00 <sup>d</sup>    | 0.06±0.00 <sup>b</sup>   | 0.07±0.00 <sup>a</sup>   | 0.05±0.00 <sup>c</sup>   | 0.05±0.00 <sup>c</sup>   |
|                        | MAP/UV                  | 0.02±0.00 <sup>e</sup>    | 0.02±0.00 <sup>e</sup>   | 0.01±0.00 <sup>e</sup>   | 0.04±0.00 <sup>d</sup>   | 0.05±0.00 <sup>c</sup>   | 0.02±0.00 <sup>e</sup>    | 0.02±0.00 <sup>e</sup>   | 0.02±0.00 <sup>e</sup>   | 0.10±0.00 <sup>b</sup>   | 0.16±0.00 <sup>a</sup>   |
| Putrescine             | AP                      | 0.01±0.00 <sup>e</sup>    | 0.01±0.00 <sup>e</sup>   | 0.01±0.00 <sup>e</sup>   | 0.01±0.00 <sup>e</sup>   | 0.06±0.00 <sup>c</sup>   | 0.07±0.00 <sup>c</sup>    | 0.07±0.00 <sup>c</sup>   | 0.04±0.00 <sup>d</sup>   | 0.11±0.00 <sup>b</sup>   | 0.14±0.00 <sup>a</sup>   |
|                        | VP                      | 0.01±0.00 <sup>d</sup>    | 0.01±0.00 <sup>d</sup>   | 0.01±0.00 <sup>d</sup>   | 0.01±0.00 <sup>d</sup>   | 0.01±0.00 <sup>d</sup>   | 0.01±0.00 <sup>d</sup>    | 0.13±0.00 <sup>c</sup>   | 0.17±0.00 <sup>b</sup>   | 0.30±0.00 <sup>a</sup>   | 0.14±0.00 <sup>c</sup>   |
|                        | MAP                     | 0.00±0.00 <sup>g</sup>    | 0.01±0.00 <sup>f</sup>   | 0.01±0.00 <sup>g</sup>   | 0.01±0.00 <sup>g</sup>   | 0.01±0.00 <sup>e</sup>   | 0.01±0.00 <sup>d</sup>    | 0.01±0.00 <sup>e</sup>   | 0.03±0.00 <sup>c</sup>   | 0.14±0.00 <sup>b</sup>   | 0.18±0.00 <sup>a</sup>   |
|                        | UV                      | 0.01±0.00 <sup>de</sup>   | 0.00±0.00 <sup>e</sup>   | 0.01±0.00 <sup>de</sup>  | 0.01±0.00 <sup>de</sup>  | 0.01±0.00 <sup>de</sup>  | 0.01±0.00 <sup>de</sup>   | 0.01±0.00 <sup>d</sup>   | 0.14±0.00 <sup>c</sup>   | 0.22±0.01 <sup>a</sup>   | 0.15±0.00 <sup>b</sup>   |
|                        | MAP/UV                  | 0.05±0.00 <sup>a</sup>    | 0.02±0.00 <sup>c</sup>   | 0.03±0.00 <sup>b</sup>   | 0.04±0.00 <sup>b</sup>   | 0.01±0.00 <sup>de</sup>  | 0.02±0.00 <sup>d</sup>    | 0.01±0.00 <sup>e</sup>   | 0.01±0.00 <sup>e</sup>   | 0.01±0.00 <sup>e</sup>   | 0.03±0.00 <sup>b</sup>   |
| Spermidin <sup>e</sup> | AP                      | 0.01±0.00 <sup>de</sup>   | 0.01±0.00 <sup>cd</sup>  | 0.01±0.00 <sup>cd</sup>  | 0.01±0.00 <sup>e</sup>   | 0.01±0.00 <sup>de</sup>  | 0.01±0.00 <sup>e</sup>    | 0.01±0.00 <sup>c</sup>   | 0.02±0.00 <sup>b</sup>   | 0.02±0.00 <sup>b</sup>   | 0.03±0.00 <sup>a</sup>   |
|                        | VP                      | 0.01±0.00 <sup>ab</sup>   | 0.01±0.00 <sup>c</sup>   | 0.01±0.00 <sup>a</sup>   | 0.01±0.00 <sup>bc</sup>  | 0.01±0.00 <sup>c</sup>   | 0.01±0.00 <sup>c</sup>    | 0.01±0.00 <sup>a</sup>   | 0.01±0.00 <sup>bc</sup>  | 0.01±0.00 <sup>bc</sup>  | 0.01±0.00 <sup>bc</sup>  |
|                        | MAP                     | 0.01±0.00 <sup>bcd</sup>  | 0.01±0.00 <sup>abc</sup> | 0.01±0.00 <sup>e</sup>   | 0.01±0.00 <sup>bcd</sup> | 0.01±0.00 <sup>de</sup>  | 0.01±0.00 <sup>cd</sup>   | 0.01±0.00 <sup>a</sup>   | 0.01±0.00 <sup>ab</sup>  | 0.01±0.00 <sup>de</sup>  | 0.01±0.00 <sup>bcd</sup> |
|                        | UV                      | 0.01±0.00 <sup>abcd</sup> | 0.01±0.00 <sup>bcd</sup> | 0.01±0.00 <sup>bcd</sup> | 0.01±0.00 <sup>d</sup>   | 0.01±0.00 <sup>bcd</sup> | 0.01±0.00 <sup>abcd</sup> | 0.01±0.00 <sup>ab</sup>  | 0.01±0.00 <sup>abc</sup> | 0.01±0.00 <sup>a</sup>   | 0.01±0.00 <sup>cd</sup>  |
|                        | MAP/UV                  | 0.01±0.00 <sup>ab</sup>   | 0.01±0.00 <sup>abc</sup> | 0.01±0.00 <sup>abc</sup> | 0.01±0.00 <sup>bc</sup>  | 0.01±0.00 <sup>ab</sup>  | 0.01±0.00 <sup>c</sup>    | 0.01±0.00 <sup>abc</sup> | 0.01±0.00 <sup>a</sup>   | 0.01±0.00 <sup>abc</sup> | 0.01±0.00 <sup>a</sup>   |
| Spermine               | AP                      | 0.06±0.01 <sup>c</sup>    | 0.06±0.00 <sup>cd</sup>  | 0.06±0.00 <sup>cd</sup>  | 0.04±0.00 <sup>e</sup>   | 0.06±0.00 <sup>c</sup>   | 0.07±0.00 <sup>bc</sup>   | 0.08±0.01 <sup>a</sup>   | 0.06±0.00 <sup>c</sup>   | 0.07±0.00 <sup>ab</sup>  | 0.04±0.00 <sup>de</sup>  |
|                        | VP                      | 0.07±0.01 <sup>a</sup>    | 0.05±0.00 <sup>cd</sup>  | 0.04±0.00 <sup>de</sup>  | 0.04±0.01 <sup>de</sup>  | 0.04±0.00 <sup>e</sup>   | 0.03±0.00 <sup>e</sup>    | 0.04±0.00 <sup>de</sup>  | 0.04±0.00 <sup>de</sup>  | 0.06±0.01 <sup>ab</sup>  | 0.06±0.00 <sup>bc</sup>  |

|        |                        |                          |                         |                          |                          |                         |                         |                         |                         |                         |
|--------|------------------------|--------------------------|-------------------------|--------------------------|--------------------------|-------------------------|-------------------------|-------------------------|-------------------------|-------------------------|
| MAP    | 0.08±0.01 <sup>a</sup> | 0.04±0.00 <sup>def</sup> | 0.05±0.00 <sup>de</sup> | 0.04±0.00 <sup>efg</sup> | 0.03±0.00 <sup>g</sup>   | 0.03±0.00 <sup>fg</sup> | 0.06±0.00 <sup>cd</sup> | 0.06±0.00 <sup>cd</sup> | 0.06±0.00 <sup>bc</sup> | 0.07±0.00 <sup>ab</sup> |
| UV     | 0.06±0.01 <sup>a</sup> | 0.03±0.00 <sup>cd</sup>  | 0.03±0.00 <sup>d</sup>  | 0.03±0.00 <sup>d</sup>   | 0.03±0.00 <sup>bcd</sup> | 0.04±0.00 <sup>bc</sup> | 0.06±0.00 <sup>a</sup>  | 0.04±0.00 <sup>b</sup>  | 0.06±0.00 <sup>a</sup>  | 0.05±0.00 <sup>a</sup>  |
| MAP/UV | 0.07±0.00 <sup>a</sup> | 0.05±0.00 <sup>bc</sup>  | 0.05±0.00 <sup>bc</sup> | 0.04±0.00 <sup>cd</sup>  | 0.05±0.00 <sup>bc</sup>  | 0.04±0.00 <sup>cd</sup> | 0.03±0.00 <sup>d</sup>  | 0.05±0.00 <sup>bc</sup> | 0.05±0.00 <sup>bc</sup> | 0.05±0.01 <sup>b</sup>  |

Results are expressed as mean ± standard deviation (n = 10). <sup>a,b,c,d,e,f,g</sup> Different letters in the same row within same treatment indicate significant differences (p < 0.05) among days of storage. <sup>a</sup>AP – air-packed tilapia fillets, VP – vacuum-packed tilapia fillets, MAP – MAP-packed tilapia fillets with 50% CO<sub>2</sub> and 50% N<sub>2</sub>, UV – UV-C treated tilapia fillets at 0.30 J/cm<sup>2</sup>, and MAP/UV – MAP-packed tilapia fillets with 50% CO<sub>2</sub> and 50% N<sub>2</sub> treated with UV-C at 0.30 J/cm<sup>2</sup>.

**Supplementary File S3.** Results of pH, ammonia ( $\mu\text{g/g}$ ) and malondialdehyde (MDA;  $\text{mg/kg}$ ) in tilapia (*Oreochromis niloticus*) fillets non- and treated with ultraviolet radiation (UV-C) and modified atmosphere packaging (MAP) stored at  $4 \pm 1$  °C for 10 days.

| Parameters | Treatments <sup>‡</sup> | Days of storage         |                          |                          |                          |                          |                         |                          |                          |                          |                         |
|------------|-------------------------|-------------------------|--------------------------|--------------------------|--------------------------|--------------------------|-------------------------|--------------------------|--------------------------|--------------------------|-------------------------|
|            |                         | 1                       | 2                        | 3                        | 4                        | 5                        | 6                       | 7                        | 8                        | 9                        | 10                      |
| pH         | AP                      | 6.23±0.01 <sup>b</sup>  | 6.29±0.01 <sup>a</sup>   | 6.20±0.01 <sup>bc</sup>  | 6.19±0.01 <sup>bc</sup>  | 6.20±0.01 <sup>bc</sup>  | 6.15±0.01 <sup>cd</sup> | 6.12±0.01 <sup>d</sup>   | 6.17±0.03 <sup>bcd</sup> | 6.05±0.01 <sup>e</sup>   | 5.78±0.06 <sup>f</sup>  |
|            | VP                      | 6.20±0.01 <sup>ab</sup> | 6.25±0.02 <sup>a</sup>   | 6.20±0.02 <sup>ab</sup>  | 6.19±0.01 <sup>ab</sup>  | 6.03±0.06 <sup>c</sup>   | 6.16±0.01 <sup>b</sup>  | 5.59±0.03 <sup>e</sup>   | 6.04±0.01 <sup>c</sup>   | 5.98±0.02 <sup>d</sup>   | 6.07±0.01 <sup>c</sup>  |
|            | MAP                     | 6.27±0.01 <sup>a</sup>  | 6.19±0.02 <sup>b</sup>   | 6.21±0.02 <sup>b</sup>   | 6.19±0.01 <sup>b</sup>   | 6.11±0.01 <sup>c</sup>   | 5.96±0.01 <sup>e</sup>  | 5.79±0.02 <sup>f</sup>   | 5.75±0.02 <sup>f</sup>   | 6.06±0.01 <sup>d</sup>   | 6.06±0.02 <sup>d</sup>  |
|            | UV                      | 6.24±0.01 <sup>b</sup>  | 6.30±0.02 <sup>a</sup>   | 6.16±0.01 <sup>c</sup>   | 6.30±0.01 <sup>a</sup>   | 6.12±0.01 <sup>c</sup>   | 6.16±0.01 <sup>c</sup>  | 5.92±0.01 <sup>d</sup>   | 5.84±0.01 <sup>e</sup>   | 5.67±0.04 <sup>f</sup>   | 5.94±0.01 <sup>d</sup>  |
|            | MAP/UV                  | 6.20±0.00 <sup>ab</sup> | 6.23±0.02 <sup>a</sup>   | 6.14±0.01 <sup>c</sup>   | 6.15±0.01 <sup>bc</sup>  | 6.00±0.01 <sup>d</sup>   | 6.15±0.05 <sup>bc</sup> | 5.95±0.02 <sup>e</sup>   | 5.79±0.01 <sup>f</sup>   | 5.74±0.01 <sup>g</sup>   | 6.02±0.01 <sup>d</sup>  |
| Ammonia    | AP                      | 0.70±0.04 <sup>e</sup>  | 0.74±0.04 <sup>e</sup>   | 1.18±0.10 <sup>cd</sup>  | 0.97±0.02 <sup>d</sup>   | 1.09±0.05 <sup>cd</sup>  | 1.03±0.04 <sup>d</sup>  | 1.01±0.06 <sup>d</sup>   | 1.87±0.03 <sup>a</sup>   | 1.25±0.08 <sup>c</sup>   | 1.52±0.03 <sup>b</sup>  |
|            | VP                      | 0.78±0.06 <sup>d</sup>  | 1.02±0.04 <sup>cd</sup>  | 1.03±0.06 <sup>c</sup>   | 1.03±0.07 <sup>c</sup>   | 1.02±0.01 <sup>cd</sup>  | 1.03±0.08 <sup>c</sup>  | 1.19±0.04 <sup>bc</sup>  | 1.31±0.10 <sup>ab</sup>  | 1.25±0.07 <sup>abc</sup> | 1.46±0.02 <sup>a</sup>  |
|            | MAP                     | 0.78±0.05 <sup>ef</sup> | 0.57±0.05 <sup>f</sup>   | 1.02±0.07 <sup>cd</sup>  | 0.93±0.03 <sup>de</sup>  | 0.93±0.07 <sup>de</sup>  | 0.89±0.04 <sup>de</sup> | 0.97±0.06 <sup>cde</sup> | 1.17±0.07 <sup>bc</sup>  | 1.32±0.10 <sup>ab</sup>  | 1.51±0.00 <sup>a</sup>  |
|            | UV                      | 0.61±0.04 <sup>d</sup>  | 0.77±0.06 <sup>d</sup>   | 1.14±0.02 <sup>abc</sup> | 1.11±0.07 <sup>abc</sup> | 1.02±0.04 <sup>c</sup>   | 1.01±0.03 <sup>c</sup>  | 1.11±0.04 <sup>abc</sup> | 1.07±0.06 <sup>bc</sup>  | 1.28±0.11 <sup>ab</sup>  | 1.30±0.00 <sup>a</sup>  |
|            | MAP/UV                  | 0.84±0.05 <sup>de</sup> | 0.87±0.05 <sup>cde</sup> | 0.81±0.07 <sup>e</sup>   | 0.96±0.09 <sup>cde</sup> | 0.95±0.06 <sup>cde</sup> | 1.10±0.01 <sup>bc</sup> | 0.99±0.00 <sup>cde</sup> | 1.08±0.06 <sup>bcd</sup> | 1.25±0.10 <sup>ab</sup>  | 1.35±0.06 <sup>a</sup>  |
| MDA        | AP                      | 0.04±0.00 <sup>e</sup>  | 0.04±0.00 <sup>e</sup>   | 0.01±0.00 <sup>f</sup>   | 0.03±0.00 <sup>e</sup>   | 0.07±0.00 <sup>d</sup>   | 0.01±0.00 <sup>f</sup>  | 0.22±0.01 <sup>a</sup>   | 0.08±0.01 <sup>d</sup>   | 0.11±0.00 <sup>e</sup>   | 0.19±0.01 <sup>b</sup>  |
|            | VP                      | 0.02±0.00 <sup>e</sup>  | 0.04±0.00 <sup>e</sup>   | 0.04±0.00 <sup>e</sup>   | 0.06±0.00 <sup>b</sup>   | 0.03±0.00 <sup>d</sup>   | 0.04±0.00 <sup>e</sup>  | 0.19±0.00 <sup>a</sup>   | 0.02±0.00 <sup>e</sup>   | 0.02±0.00 <sup>e</sup>   | 0.02±0.00 <sup>e</sup>  |
|            | MAP                     | 0.02±0.00 <sup>g</sup>  | 0.03±0.00 <sup>e</sup>   | 0.02±0.00 <sup>f</sup>   | 0.05±0.00 <sup>d</sup>   | 0.06±0.00 <sup>c</sup>   | 0.03±0.00 <sup>f</sup>  | 0.02±0.00 <sup>f</sup>   | 0.38±0.00 <sup>b</sup>   | 0.41±0.00 <sup>a</sup>   | 0.03±0.00 <sup>e</sup>  |
|            | UV                      | 0.05±0.00 <sup>e</sup>  | 0.02±0.00 <sup>f</sup>   | 0.03±0.00 <sup>e</sup>   | 0.03±0.00 <sup>de</sup>  | 0.04±0.00 <sup>d</sup>   | 0.06±0.00 <sup>c</sup>  | 0.02±0.00 <sup>f</sup>   | 0.12±0.00 <sup>a</sup>   | 0.05±0.00 <sup>e</sup>   | 0.07±0.00 <sup>b</sup>  |
|            | MAP/UV                  | 0.04±0.00 <sup>h</sup>  | 0.05±0.00 <sup>gh</sup>  | 0.10±0.00 <sup>fg</sup>  | 0.15±0.01 <sup>ef</sup>  | 0.16±0.00 <sup>e</sup>   | 0.26±0.00 <sup>d</sup>  | 0.32±0.00 <sup>c</sup>   | 0.75±0.04 <sup>b</sup>   | 0.90±0.01 <sup>a</sup>   | 0.11±0.01 <sup>ef</sup> |

Results are expressed as mean  $\pm$  standard deviation ( $n = 10$ ). <sup>a,b,c,d,e,f,g,h</sup> Different letters in the same row within same treatment indicate significant differences ( $p < 0.05$ ) among days of storage. <sup>‡</sup>AP – air-packed tilapia fillets, VP – vacuum-packed tilapia fillets, MAP – MAP-packed tilapia fillets with 50% CO<sub>2</sub> and 50% N<sub>2</sub>, UV – UV-C treated tilapia fillets at 0.30 J/cm<sup>2</sup>, and MAP/UV – MAP-packed tilapia fillets with 50% CO<sub>2</sub> and 50% N<sub>2</sub> treated with UV-C at 0.30 J/cm<sup>2</sup>.

**Supplementary File S4.** L\* (lightness), a\* (redness), b\* (yellowness) parameters and total color difference ( $\Delta E$ ) in tilapia (*Oreochromis niloticus*) fillets non- and treated with ultraviolet radiation (UV-C) and modified atmosphere packaging (MAP) stored at  $4 \pm 1$  °C for 10 days.

| Parameters        | Treatments <sup>‡</sup> | Days of storage           |                            |                           |                            |                             |                           |                          |                             |                            |                           |
|-------------------|-------------------------|---------------------------|----------------------------|---------------------------|----------------------------|-----------------------------|---------------------------|--------------------------|-----------------------------|----------------------------|---------------------------|
|                   |                         | 1                         | 2                          | 3                         | 4                          | 5                           | 6                         | 7                        | 8                           | 9                          | 10                        |
| L*                | AP                      | 59.50±2.17 <sup>ab</sup>  | 58.95±2.96 <sup>ab</sup>   | 58.40±1.61 <sup>ab</sup>  | 59.64±3.56 <sup>ab</sup>   | 60.53±1.61 <sup>ab</sup>    | 56.82±1.78 <sup>b</sup>   | 60.06±5.75 <sup>ab</sup> | 59.12±2.91 <sup>ab</sup>    | 63.91±2.94 <sup>a</sup>    | 64.11±2.59 <sup>a</sup>   |
|                   | VP                      | 57.98±2.22 <sup>cde</sup> | 58.48±2.39 <sup>bcde</sup> | 61.90±2.90 <sup>ab</sup>  | 57.20±1.63 <sup>de</sup>   | 58.91±1.39 <sup>abcde</sup> | 56.53±0.96 <sup>c</sup>   | 62.12±2.37 <sup>a</sup>  | 59.44±1.22 <sup>abcde</sup> | 60.58±1.21 <sup>abcd</sup> | 60.93±0.77 <sup>abc</sup> |
|                   | MAP                     | 55.55±2.18 <sup>b</sup>   | 60.89±3.76 <sup>ab</sup>   | 63.16±2.66 <sup>a</sup>   | 58.74±2.69 <sup>ab</sup>   | 62.94±3.59 <sup>a</sup>     | 62.00±1.56 <sup>a</sup>   | 58.66±1.13 <sup>ab</sup> | 60.88±4.67 <sup>ab</sup>    | 64.46±5.11 <sup>a</sup>    | 59.87±3.53 <sup>ab</sup>  |
|                   | UV                      | 59.99±2.28 <sup>bcd</sup> | 58.13±1.53 <sup>cd</sup>   | 61.36±1.35 <sup>abc</sup> | 60.79±3.16 <sup>abcd</sup> | 61.35±3.10 <sup>abc</sup>   | 59.79±3.44 <sup>bcd</sup> | 56.87±1.90 <sup>d</sup>  | 58.21±1.58 <sup>cd</sup>    | 64.89±2.02 <sup>a</sup>    | 63.97±1.42 <sup>ab</sup>  |
|                   | MAP/UV                  | 59.61±1.78 <sup>ab</sup>  | 60.48±3.16 <sup>ab</sup>   | 60.15±1.88 <sup>ab</sup>  | 64.01±4.00 <sup>a</sup>    | 64.67±3.88 <sup>a</sup>     | 58.67±2.48 <sup>b</sup>   | 59.81±2.67 <sup>ab</sup> | 60.50±2.97 <sup>ab</sup>    | 64.44±1.80 <sup>a</sup>    | 63.81±1.77 <sup>ab</sup>  |
| a*                | AP                      | 0.91±0.06 <sup>a</sup>    | -1.15±0.11 <sup>cd</sup>   | -2.47±0.28 <sup>g</sup>   | -2.03±0.11 <sup>f</sup>    | -1.20±0.13 <sup>cd</sup>    | -1.79±0.09 <sup>ef</sup>  | -1.03±0.05 <sup>bc</sup> | -0.73±0.05 <sup>b</sup>     | -1.00±0.12 <sup>bc</sup>   | -1.47±0.12 <sup>de</sup>  |
|                   | VP                      | 0.25±0.03 <sup>a</sup>    | -0.56±0.06 <sup>b</sup>    | -0.65±0.03 <sup>bc</sup>  | -1.02±0.07 <sup>de</sup>   | -1.19±0.15 <sup>c</sup>     | -1.27±0.04 <sup>c</sup>   | -1.82±0.14 <sup>f</sup>  | -0.76±0.13 <sup>bcd</sup>   | -0.86±0.11 <sup>cd</sup>   | -0.90±0.07 <sup>cd</sup>  |
|                   | MAP                     | -1.16±0.17 <sup>b</sup>   | -0.40±0.04 <sup>a</sup>    | -2.57±0.03 <sup>c</sup>   | -1.42±0.11 <sup>b</sup>    | -1.45±0.16 <sup>b</sup>     | -2.49±0.13 <sup>c</sup>   | -2.53±0.08 <sup>c</sup>  | -1.47±0.18 <sup>b</sup>     | -2.41±0.05 <sup>c</sup>    | -3.96±0.03 <sup>d</sup>   |
|                   | UV                      | -1.24±0.21 <sup>bc</sup>  | -1.46±0.13 <sup>cd</sup>   | -0.83±0.03 <sup>a</sup>   | -1.30±0.03 <sup>bc</sup>   | -1.24±0.03 <sup>bc</sup>    | -2.12±0.11 <sup>c</sup>   | -1.64±0.03 <sup>d</sup>  | -0.81±0.11 <sup>a</sup>     | -1.00±0.15 <sup>ab</sup>   | -2.66±0.04 <sup>f</sup>   |
|                   | MAP/UV                  | -2.21±0.14 <sup>cd</sup>  | -1.64±0.12 <sup>b</sup>    | -0.55±0.05 <sup>a</sup>   | -1.66±0.21 <sup>b</sup>    | -2.04±0.16 <sup>bcd</sup>   | -2.01±0.04 <sup>bcd</sup> | -1.97±0.07 <sup>bc</sup> | -2.86±0.49 <sup>c</sup>     | -1.58±0.10 <sup>b</sup>    | -2.52±0.03 <sup>c</sup>   |
| b*                | AP                      | 9.20±0.87 <sup>bc</sup>   | 8.51±0.36 <sup>c</sup>     | 9.43±0.52 <sup>bc</sup>   | 11.13±0.79 <sup>a</sup>    | 9.13±0.78 <sup>bc</sup>     | 9.24±0.40 <sup>bc</sup>   | 12.16±0.20 <sup>a</sup>  | 9.40±0.81 <sup>bc</sup>     | 11.86±0.67 <sup>a</sup>    | 10.67±0.73 <sup>ab</sup>  |
|                   | VP                      | 7.28±0.42 <sup>cd</sup>   | 9.55±0.52 <sup>b</sup>     | 8.36±0.08 <sup>bcd</sup>  | 8.79±0.74 <sup>bc</sup>    | 7.09±0.06 <sup>d</sup>      | 7.85±0.55 <sup>cd</sup>   | 11.34±1.01 <sup>a</sup>  | 7.81±0.54 <sup>cd</sup>     | 11.55±0.99 <sup>a</sup>    | 8.11±0.57 <sup>bcd</sup>  |
|                   | MAP                     | 8.11±1.11 <sup>d</sup>    | 12.56±0.88 <sup>a</sup>    | 10.51±1.35 <sup>abc</sup> | 10.10±0.52 <sup>bcd</sup>  | 12.14±0.57 <sup>ab</sup>    | 10.74±0.51 <sup>abc</sup> | 9.22±0.56 <sup>cd</sup>  | 10.80±0.85 <sup>abc</sup>   | 12.54±1.11 <sup>a</sup>    | 11.40±0.93 <sup>ab</sup>  |
|                   | UV                      | 8.50±0.69 <sup>cd</sup>   | 9.94±0.60 <sup>b</sup>     | 8.45±0.61 <sup>cd</sup>   | 8.74±0.20 <sup>c</sup>     | 7.48±0.54 <sup>d</sup>      | 8.38±0.07 <sup>cd</sup>   | 11.27±0.69 <sup>a</sup>  | 7.60±0.16 <sup>cd</sup>     | 11.34±0.04 <sup>a</sup>    | 8.39±0.63 <sup>cd</sup>   |
|                   | MAP/UV                  | 10.45±0.35 <sup>c</sup>   | 12.19±0.92 <sup>b</sup>    | 11.59±0.53 <sup>bc</sup>  | 8.57±0.43 <sup>d</sup>     | 11.49±0.51 <sup>bc</sup>    | 11.26±0.62 <sup>bc</sup>  | 12.45±0.70 <sup>b</sup>  | 12.55±0.75 <sup>b</sup>     | 14.42±0.39 <sup>a</sup>    | 11.23±0.90 <sup>bc</sup>  |
| $\Delta_{10-0}^e$ | Total color difference  |                           |                            |                           |                            |                             |                           |                          |                             |                            |                           |
|                   |                         |                           |                            | AP                        |                            |                             |                           |                          | 5.46±0.72 <sup>b</sup>      |                            |                           |
|                   |                         |                           |                            | VP                        |                            |                             |                           |                          | 4.15±0.14 <sup>c</sup>      |                            |                           |
|                   |                         |                           |                            | MAP                       |                            |                             |                           |                          | 6.79±0.62 <sup>a</sup>      |                            |                           |
|                   |                         |                           |                            | UV                        |                            |                             |                           |                          | 4.24±0.30 <sup>c</sup>      |                            |                           |
|                   |                         |                           | MAP/UV                     |                           |                            |                             |                           | 6.81±0.83 <sup>a</sup>   |                             |                            |                           |

Results are expressed as mean  $\pm$  standard deviation (n = 10). <sup>a,b,c,d,e,f,g</sup>Different letters in the same row within same treatment indicate significant differences (p < 0.05) among days of storage. <sup>‡</sup>AP – air-packed tilapia fillets, VP – vacuum-packed tilapia fillets, MAP – MAP-packed tilapia fillets with 50% CO<sub>2</sub> and 50% N<sub>2</sub>, UV – UV-C treated tilapia fillets at 0.30 J/cm<sup>2</sup>, and MAP/UV – MAP-packed tilapia fillets with 50% CO<sub>2</sub> and 50% N<sub>2</sub> treated with UV-C at 0.30 J/cm<sup>2</sup>. <sup>e</sup> $\Delta E_{10-0}$  - Total color difference between days 10 and 0 of refrigerated storage of each treatment. <sup>a,b,c</sup>Different letters in the column indicate significant differences (p < 0.05) among treatments.

**Supplementary File S5.** Results of hardness (Newton - N), chewiness (N × mm), cohesiveness (ratio), springiness (ratio) and resilience (ratio) in tilapia (*Oreochromis niloticus*) fillets non- and treated with ultraviolet radiation (UV-C) and modified atmosphere packaging (MAP) stored at 4 ± 1 °C for 10 days.

| Parameters   | Treatments <sup>‡</sup> | Days of storage          |                          |                           |                           |                          |                           |                           |                          |                          |                         |
|--------------|-------------------------|--------------------------|--------------------------|---------------------------|---------------------------|--------------------------|---------------------------|---------------------------|--------------------------|--------------------------|-------------------------|
|              |                         | 1                        | 2                        | 3                         | 4                         | 5                        | 6                         | 7                         | 8                        | 9                        | 10                      |
| Hardness     | AP                      | 22.69±2.93 <sup>a</sup>  | 23.07±2.51 <sup>a</sup>  | 21.17±2.40 <sup>a</sup>   | 12.23±1.46 <sup>bc</sup>  | 13.29±2.04 <sup>bc</sup> | 15.07±2.43 <sup>b</sup>   | 9.10±0.96 <sup>c</sup>    | 12.10±0.62 <sup>bc</sup> | 14.63±0.08 <sup>b</sup>  | 9.73±1.31 <sup>bc</sup> |
|              | VP                      | 16.37±0.66 <sup>a</sup>  | 16.17±0.67 <sup>a</sup>  | 15.60±0.35 <sup>ab</sup>  | 15.49±0.82 <sup>ab</sup>  | 15.52±0.46 <sup>ab</sup> | 15.40±0.03 <sup>ab</sup>  | 14.06±0.40 <sup>bc</sup>  | 14.16±0.34 <sup>bc</sup> | 13.32±0.75 <sup>c</sup>  | 13.15±0.82 <sup>c</sup> |
|              | MAP                     | 25.67±0.55 <sup>a</sup>  | 25.77±0.39 <sup>a</sup>  | 25.25±2.15 <sup>a</sup>   | 21.19±0.15 <sup>b</sup>   | 19.86±1.58 <sup>bc</sup> | 16.99±0.43 <sup>cd</sup>  | 15.04±1.78 <sup>d</sup>   | 16.53±0.83 <sup>d</sup>  | 15.40±0.87 <sup>d</sup>  | 13.89±0.86 <sup>d</sup> |
|              | UV                      | 25.62±1.10 <sup>a</sup>  | 24.26±1.19 <sup>ab</sup> | 23.63±1.48 <sup>abc</sup> | 22.40±0.91 <sup>abc</sup> | 20.69±1.05 <sup>cd</sup> | 21.36±1.13 <sup>bcd</sup> | 21.19±1.87 <sup>bcd</sup> | 18.55±1.24 <sup>de</sup> | 18.08±0.60 <sup>de</sup> | 17.09±1.37 <sup>e</sup> |
|              | MAP/UV                  | 23.35±1.79 <sup>ab</sup> | 22.81±1.29 <sup>ab</sup> | 24.33±4.17 <sup>ab</sup>  | 25.60±1.41 <sup>a</sup>   | 24.84±1.64 <sup>ab</sup> | 23.52±0.80 <sup>ab</sup>  | 22.30±1.27 <sup>ab</sup>  | 22.99±1.23 <sup>ab</sup> | 22.33±2.19 <sup>ab</sup> | 19.64±2.14 <sup>b</sup> |
| Chewiness    | AP                      | 7.54±0.81 <sup>a</sup>   | 5.75±0.50 <sup>b</sup>   | 6.10±0.30 <sup>b</sup>    | 3.82±0.49 <sup>c</sup>    | 2.53±0.07 <sup>d</sup>   | 2.67±0.27 <sup>d</sup>    | 2.34±0.20 <sup>d</sup>    | 3.19±0.26 <sup>cd</sup>  | 2.25±0.16 <sup>d</sup>   | 2.94±0.13 <sup>cd</sup> |
|              | VP                      | 5.20±0.34 <sup>a</sup>   | 4.62±0.69 <sup>ab</sup>  | 3.84±0.34 <sup>bcde</sup> | 4.10±0.47 <sup>bc</sup>   | 2.96±0.03 <sup>ef</sup>  | 4.03±0.12 <sup>bcd</sup>  | 4.20±0.01 <sup>b</sup>    | 3.21±0.07 <sup>def</sup> | 3.16±0.23 <sup>def</sup> | 2.81±0.12 <sup>f</sup>  |
|              | MAP                     | 7.07±0.50 <sup>a</sup>   | 7.32±0.91 <sup>a</sup>   | 7.12±0.84 <sup>a</sup>    | 6.34±0.48 <sup>ab</sup>   | 5.62±0.14 <sup>b</sup>   | 2.45±0.29 <sup>c</sup>    | 2.86±0.37 <sup>c</sup>    | 1.66±0.17 <sup>c</sup>   | 1.84±0.07 <sup>c</sup>   | 1.86±0.05 <sup>c</sup>  |
|              | UV                      | 6.68±0.12 <sup>ab</sup>  | 7.04±0.13 <sup>a</sup>   | 7.51±0.44 <sup>a</sup>    | 6.96±0.60 <sup>ab</sup>   | 4.77±0.34 <sup>d</sup>   | 5.36±0.51 <sup>cd</sup>   | 6.00±0.37 <sup>bc</sup>   | 5.50±0.19 <sup>cd</sup>  | 3.72±0.31 <sup>e</sup>   | 2.87±0.25 <sup>e</sup>  |
|              | MAP/UV                  | 8.54±0.84 <sup>a</sup>   | 7.88±0.26 <sup>a</sup>   | 8.49±0.41 <sup>a</sup>    | 6.06±0.28 <sup>bc</sup>   | 6.69±0.32 <sup>b</sup>   | 6.03±0.41 <sup>bc</sup>   | 5.19±0.49 <sup>c</sup>    | 5.41±0.24 <sup>c</sup>   | 5.04±0.24 <sup>c</sup>   | 3.01±0.16 <sup>d</sup>  |
| Cohesiveness | AP                      | 0.54±0.03 <sup>a</sup>   | 0.52±0.05 <sup>a</sup>   | 0.52±0.01 <sup>a</sup>    | 0.52±0.01 <sup>a</sup>    | 0.50±0.04 <sup>a</sup>   | 0.50±0.01 <sup>a</sup>    | 0.52±0.06 <sup>a</sup>    | 0.49±0.04 <sup>a</sup>   | 0.51±0.04 <sup>a</sup>   | 0.52±0.01 <sup>a</sup>  |
|              | VP                      | 0.51±0.04 <sup>a</sup>   | 0.55±0.03 <sup>a</sup>   | 0.54±0.02 <sup>a</sup>    | 0.52±0.03 <sup>a</sup>    | 0.49±0.02 <sup>a</sup>   | 0.50±0.01 <sup>a</sup>    | 0.52±0.06 <sup>a</sup>    | 0.50±0.02 <sup>a</sup>   | 0.52±0.02 <sup>a</sup>   | 0.51±0.02 <sup>a</sup>  |
|              | MAP                     | 0.49±0.02 <sup>a</sup>   | 0.51±0.02 <sup>a</sup>   | 0.50±0.002 <sup>a</sup>   | 0.52±0.05 <sup>a</sup>    | 0.49±0.02 <sup>a</sup>   | 0.52±0.03 <sup>a</sup>    | 0.52±0.03 <sup>a</sup>    | 0.51±0.04 <sup>a</sup>   | 0.50±0.01 <sup>a</sup>   | 0.49±0.05 <sup>a</sup>  |
|              | UV                      | 0.50±0.03 <sup>a</sup>   | 0.50±0.04 <sup>a</sup>   | 0.49±0.01 <sup>a</sup>    | 0.53±0.01 <sup>a</sup>    | 0.53±0.02 <sup>a</sup>   | 0.50±0.02 <sup>a</sup>    | 0.51±0.00 <sup>a</sup>    | 0.50±0.04 <sup>a</sup>   | 0.49±0.04 <sup>a</sup>   | 0.51±0.02 <sup>a</sup>  |
|              | MAP/UV                  | 0.50±0.07 <sup>a</sup>   | 0.52±0.02 <sup>a</sup>   | 0.52±0.04 <sup>a</sup>    | 0.54±0.01 <sup>a</sup>    | 0.54±0.01 <sup>a</sup>   | 0.53±0.03 <sup>a</sup>    | 0.52±0.02 <sup>a</sup>    | 0.50±0.05 <sup>a</sup>   | 0.51±0.04 <sup>a</sup>   | 0.51±0.02 <sup>a</sup>  |
| Springiness  | AP                      | 0.53±0.01 <sup>a</sup>   | 0.53±0.01 <sup>a</sup>   | 0.56±0.01 <sup>a</sup>    | 0.54±0.02 <sup>a</sup>    | 0.54±0.01 <sup>a</sup>   | 0.53±0.01 <sup>a</sup>    | 0.54±0.05 <sup>a</sup>    | 0.52±0.03 <sup>a</sup>   | 0.54±0.02 <sup>a</sup>   | 0.55±0.02 <sup>a</sup>  |
|              | VP                      | 0.56±0.02 <sup>a</sup>   | 0.56±0.04 <sup>a</sup>   | 0.56±0.04 <sup>a</sup>    | 0.52±0.02 <sup>a</sup>    | 0.50±0.02 <sup>a</sup>   | 0.55±0.02 <sup>a</sup>    | 0.56±0.03 <sup>a</sup>    | 0.56±0.03 <sup>a</sup>   | 0.52±0.02 <sup>a</sup>   | 0.53±0.02 <sup>a</sup>  |
|              | MAP                     | 0.53±0.04 <sup>a</sup>   | 0.51±0.08 <sup>a</sup>   | 0.56±0.03 <sup>a</sup>    | 0.54±0.01 <sup>a</sup>    | 0.55±0.03 <sup>a</sup>   | 0.54±0.02 <sup>a</sup>    | 0.52±0.05 <sup>a</sup>    | 0.53±0.02 <sup>a</sup>   | 0.53±0.02 <sup>a</sup>   | 0.53±0.01 <sup>a</sup>  |
|              | UV                      | 0.52±0.02 <sup>a</sup>   | 0.51±0.02 <sup>a</sup>   | 0.54±0.02 <sup>a</sup>    | 0.54±0.01 <sup>a</sup>    | 0.53±0.01 <sup>a</sup>   | 0.54±0.03 <sup>a</sup>    | 0.52±0.01 <sup>a</sup>    | 0.53±0.01 <sup>a</sup>   | 0.51±0.01 <sup>a</sup>   | 0.54±0.01 <sup>a</sup>  |
|              | MAP/UV                  | 0.57±0.03 <sup>a</sup>   | 0.57±0.01 <sup>a</sup>   | 0.56±0.03 <sup>a</sup>    | 0.52±0.03 <sup>a</sup>    | 0.58±0.00 <sup>a</sup>   | 0.52±0.06 <sup>a</sup>    | 0.53±0.01 <sup>a</sup>    | 0.52±0.03 <sup>a</sup>   | 0.51±0.02 <sup>a</sup>   | 0.53±0.03 <sup>a</sup>  |
| Resilience   | AP                      | 0.14±0.01 <sup>a</sup>   | 0.14±0.01 <sup>a</sup>   | 0.14±0.01 <sup>a</sup>    | 0.14±0.01 <sup>a</sup>    | 0.15±0.01 <sup>a</sup>   | 0.15±0.01 <sup>a</sup>    | 0.16±0.01 <sup>a</sup>    | 0.15±0.01 <sup>a</sup>   | 0.15±0.01 <sup>a</sup>   | 0.15±0.01 <sup>a</sup>  |
|              | VP                      | 0.14±0.01 <sup>a</sup>   | 0.14±0.01 <sup>a</sup>   | 0.14±0.01 <sup>a</sup>    | 0.14±0.01 <sup>a</sup>    | 0.15±0.01 <sup>a</sup>   | 0.15±0.01 <sup>a</sup>    | 0.15±0.01 <sup>a</sup>    | 0.16±0.01 <sup>a</sup>   | 0.16±0.02 <sup>a</sup>   | 0.14±0.01 <sup>a</sup>  |
|              | MAP                     | 0.13±0.01 <sup>a</sup>   | 0.14±0.01 <sup>a</sup>   | 0.13±0.01 <sup>a</sup>    | 0.14±0.01 <sup>a</sup>    | 0.15±0.01 <sup>a</sup>   | 0.15±0.01 <sup>a</sup>    | 0.15±0.01 <sup>a</sup>    | 0.15±0.01 <sup>a</sup>   | 0.16±0.01 <sup>a</sup>   | 0.14±0.02 <sup>a</sup>  |
|              | UV                      | 0.15±0.01 <sup>a</sup>   | 0.15±0.00 <sup>a</sup>   | 0.15±0.01 <sup>a</sup>    | 0.14±0.01 <sup>a</sup>    | 0.15±0.01 <sup>a</sup>   | 0.14±0.01 <sup>a</sup>    | 0.15±0.01 <sup>a</sup>    | 0.14±0.00 <sup>a</sup>   | 0.15±0.00 <sup>a</sup>   | 0.15±0.02 <sup>a</sup>  |
|              | MAP/UV                  | 0.14±0.01 <sup>a</sup>   | 0.14±0.02 <sup>a</sup>   | 0.14±0.01 <sup>a</sup>    | 0.15±0.01 <sup>a</sup>    | 0.15±0.01 <sup>a</sup>   | 0.15±0.01 <sup>a</sup>    | 0.16±0.00 <sup>a</sup>    | 0.14±0.01 <sup>a</sup>   | 0.15±0.01 <sup>a</sup>   | 0.15±0.01 <sup>a</sup>  |

Results are expressed as mean ± standard deviation (n = 10). <sup>a,b,c,d,e,f</sup>Different letters in the same row within same treatment indicate significant differences (p < 0.05) among days of storage. <sup>‡</sup>AP – air-packed tilapia fillets, VP – vacuum-packed tilapia fillets, MAP – MAP-packed tilapia fillets with 50% CO<sub>2</sub> and 50% N<sub>2</sub>, UV – UV-C treated tilapia fillets at 0.30 J/cm<sup>2</sup>, and MAP/UV – MAP-packed tilapia fillets with 50% CO<sub>2</sub> and 50% N<sub>2</sub> treated with UV-C at 0.30 J/cm<sup>2</sup>.
